# Supplementary material
Source: HighWire-hosted journal article supplement (https://jnm.snmjournals.org/highwire/filestream/102256/field_highwire_adjunct_files/0/246025_Supplemental_Data.pdf)
Supplement: 246025_Supplemental_Data.pdf [file 246025_Supplemental_Data.pdf]

Supplemental Table 1

| The 2017 Bethesda System for Reporting Thyroid Cytopathology: Implied Risk of Malignancy and Recommended Clinical Management |                                                                                       |                                      |                                      |                                                 |
|------------------------------------------------------------------------------------------------------------------------------|---------------------------------------------------------------------------------------|--------------------------------------|--------------------------------------|-------------------------------------------------|
| Bethesda category                                                                                                            | Diagnostic category                                                                   | Risk of Malignancy if NIFTP ≠ CA (%) | Risk of Malignancy if NIFTP = CA (%) | Standard of care management recommendations (a) |
| I                                                                                                                            | Nondiagnostic or unsatisfactory                                                       | 5-10                                 | 5-10                                 | Repeat FNA with ultrasound guidance             |
| II                                                                                                                           | Benign                                                                                | 0-3                                  | 0-3                                  | Clinical and sonographic follow-up              |
| III                                                                                                                          | Atypia of undetermined significance or follicular lesion of undetermined significance | 6-18                                 | 10-30                                | Repeat FNA, molecular testing, or lobectomy     |
| IV                                                                                                                           | Follicular neoplasm or suspicious for a follicular neoplasm                           | 10-40                                | 25-40                                | Molecular testing, lobectomy                    |
| V                                                                                                                            | Suspicious for Malignancy                                                             | 45-60                                | 50-75                                | Near-total thyroidectomy or lobectomy (b, c)    |
| VI                                                                                                                           | Malignant                                                                             | 94-96                                | 97-99                                | Near-total thyroidectomy or lobectomy (c)       |

Adapted from Ali and Cibas\*

a Actual management may depend on other factors (e.g., clinical, sonographic) besides the FNA interpretation.

b Some studies have recommended molecular analysis to assess the type of surgical procedure (lobectomy vs. total thyroidectomy).

c In the case of “suspicious for metastatic tumor” or a “malignant” interpretation indicating metastatic tumor rather than a primary thyroid malignancy, surgery may not be indicated.

NIFTP, noninvasive follicular thyroid neoplasm with papillary-like nuclear features; CA, carcinoma; FNA, fine-needle aspiration.

\*Cibas ES, Ali SZ. The 2017 Bethesda System for Reporting Thyroid Cytopathology. *Thyroid*. 2017;27:1341-1346.

Supplemental Table 2

| Summary of Most Prevalent Molecular Testing Assays |                                |                                  |                                                         |                                      |
|----------------------------------------------------|--------------------------------|----------------------------------|---------------------------------------------------------|--------------------------------------|
|                                                    | <b>Afirma<sup>®</sup> GSC</b>  | <b>ThyroSeq<sup>®</sup> v3.0</b> | <b>ThyGeNEXT<sup>®</sup> &amp; ThyraMIR<sup>®</sup></b> | <b>Rosetta GX<sup>™</sup> Reveal</b> |
| Method                                             | Next Generation Sequencing RNA | Next Generation Sequencing       | Next Generation Sequencing & microRNA expression        | microRNA expression classifier       |
| Sensitivity                                        | 91.10%                         | 98.00%                           | 88.60%                                                  | 85.00%                               |
| Specificity                                        | 68.30%                         | 81.80%                           | 85.10%                                                  | 72.00%                               |
| NPV                                                | 96.10%                         | 97.40%                           | 94.00%                                                  | 91.00%                               |
| PPV                                                | 47.10%                         | 85.70%                           | 73.80%                                                  | 59.00%                               |
| Cancer Prevalence                                  | 23.70%                         | 28.0%                            | 32.10%                                                  | 50.00%                               |

Supplemental Table 3

| Summary of Non-surgical (minimally invasive) Treatment Options for Benign Thyroid Nodules |                                                                                                                                                                   |                                                                                                                                                                         |                     |                          |                                          |
|-------------------------------------------------------------------------------------------|-------------------------------------------------------------------------------------------------------------------------------------------------------------------|-------------------------------------------------------------------------------------------------------------------------------------------------------------------------|---------------------|--------------------------|------------------------------------------|
|                                                                                           | Chemical Technique                                                                                                                                                | Thermal Techniques                                                                                                                                                      |                     |                          |                                          |
|                                                                                           | Ethanol                                                                                                                                                           | Radiofrequency Ablation (RFA)                                                                                                                                           | Laser Ablation (LA) | Microwave Ablation (MWA) | High-Intensity Focused Ultrasound (HIFU) |
| Indications                                                                               | Compressive symptoms, Cosmetic concerns, Suboptimal surgical candidates and/or Patients that refuse surgical intervention                                         |                                                                                                                                                                         |                     |                          |                                          |
| Pre-procedure Requirements                                                                | Ensure thyroid nodule is benign by means of FNA cytology assessment (two separate samplings preferred), Hold anticoagulation therapy for appropriate time period, |                                                                                                                                                                         |                     |                          |                                          |
| Maximum Thyroid Nodule Volume Reduction                                                   | ↓                                                                                                                                                                 | ↓↓↓↓                                                                                                                                                                    | ↓↓↓                 | ↓↓                       | ↓↓                                       |
| Complications                                                                             | Leakage<br>Pain<br>Hoarseness                                                                                                                                     | Hoarseness; Brachial plexus nerve injury; Local infection; Massive colliquative necrosis and Nodule rupture with fasciitis; Potential changes in thyroid hormone levels |                     |                          | Subcutaneous edema<br>Mild skin redness  |
| Thyroid Cyst                                                                              | +++                                                                                                                                                               | ---                                                                                                                                                                     | ---                 | ---                      | ---                                      |
